# Supplementary material for: Determination of Pentacyclic Triterpenoids in Plant Biomass by Porous Graphitic Carbon Liquid Chromatography—Tandem Mass Spectrometry
Source: MDPI journal article supplement (doi:10.3390/molecules28093945), 2023-05-07
Supplement: s1 [file s1]

**Table S1.** Intra-day and inter-day precision of the of the PCTs determination by porous graphitic carbon HPLC-MS/MS

| Analyte | Concentration,<br>$\mu\text{g L}^{-1}$ | Intra-day assay                                   |                |                 | Inter-day assay                                   |                |                 |
|---------|----------------------------------------|---------------------------------------------------|----------------|-----------------|---------------------------------------------------|----------------|-----------------|
|         |                                        | Measured<br>concentration<br>$\mu\text{g L}^{-1}$ | Accuracy,<br>% | Precision,<br>% | Measured<br>concentration<br>$\mu\text{g L}^{-1}$ | Accuracy,<br>% | Precision,<br>% |
| I       | 25                                     | 28.4±1.3                                          | 114            | 5.17            | 24.2±0.9                                          | 96.9           | 5.09            |
| II      | 50                                     | 48.1±1.4                                          | 96.2           | 3.32            | 49.1±2.5                                          | 98.3           | 6.86            |
| IV      | 25                                     | 25.4±1.2                                          | 101            | 5.44            | 23.8±0.9                                          | 95.4           | 4.84            |
| VII     | 50                                     | 49.5±2.4                                          | 99             | 5.62            | 45.6±7.1                                          | 91.3           | 9.54            |
| X       | 50                                     | 53.7±4.1                                          | 107            | 8.57            | 54.4±3.8                                          | 105            | 9.84            |
| III     | 25                                     | 23.5±2.1                                          | 94.2           | 9.25            | 24.9±3.1                                          | 99.7           | 14.4            |
| V       | 75                                     | 87.6±7.0                                          | 117            | 7.95            | 77.7±2.2                                          | 104            | 3.75            |
| VIII    | 125                                    | 124±12                                            | 99.5           | 11.2            | 126±7                                             | 101            | 6.71            |
| VI      | 200                                    | 217±13                                            | 109            | 6.85            | 206±2                                             | 103            | 1.31            |
| IX      | 350                                    | 315±26                                            | 89.9           | 9.61            | 406±14                                            | 116            | 4.03            |

**Table S2.** Matrix effect on the determination of PCTs by porous graphitic carbon HPLC-MS/MS estimated in the spike recovery test.

| Analyte | Initial concentration,<br>$\mu\text{g L}^{-1}$ | Spiked, $\mu\text{g L}^{-1}$ | Found, $\mu\text{g L}^{-1}$ | Recovery, % |
|---------|------------------------------------------------|------------------------------|-----------------------------|-------------|
| I       | 5.55 $\pm$ 1.54                                | 25                           | 27.8 $\pm$ 2.2              | 91          |
|         |                                                | 250                          | 210 $\pm$ 3                 | 82          |
|         |                                                | 500                          | 466 $\pm$ 11                | 92          |
| II      | 66.3 $\pm$ 5.2                                 | 50                           | 118 $\pm$ 3                 | 101         |
|         |                                                | 500                          | 527 $\pm$ 3                 | 93          |
|         |                                                | 1000                         | 1035 $\pm$ 10               | 97          |
| IV      | 1.82 $\pm$ 0.73                                | 25                           | 23.8 $\pm$ 3.3              | 89          |
|         |                                                | 250                          | 210 $\pm$ 5                 | 84          |
|         |                                                | 500                          | 476 $\pm$ 7                 | 95          |
| VII     | –                                              | 50                           | 42.5 $\pm$ 2.5              | 85          |
|         |                                                | 500                          | 424 $\pm$ 23                | 85          |
|         |                                                | 1000                         | 974 $\pm$ 18                | 97          |
| X       | –                                              | 50                           | 40.7 $\pm$ 2.7              | 81          |
|         |                                                | 500                          | 449 $\pm$ 40                | 90          |
|         |                                                | 1000                         | 936 $\pm$ 12                | 94          |
| III     | 11.3 $\pm$ 2.3                                 | 25                           | 34.4 $\pm$ 2.1              | 95          |
|         |                                                | 250                          | 246 $\pm$ 7                 | 94          |
|         |                                                | 500                          | 452 $\pm$ 7                 | 88          |
| V       | –                                              | 75                           | 67.5 $\pm$ 2.8              | 90          |
|         |                                                | 750                          | 651 $\pm$ 30                | 87          |
|         |                                                | 1500                         | 1438 $\pm$ 13               | 96          |
| VIII    | –                                              | 125                          | 123 $\pm$ 11                | 99          |
|         |                                                | 1250                         | 1102 $\pm$ 25               | 88          |
|         |                                                | 2500                         | 2225 $\pm$ 16               | 89          |
| VI      | –                                              | 200                          | 187 $\pm$ 4                 | 93          |
|         |                                                | 2000                         | 1713 $\pm$ 12               | 86          |
|         |                                                | 4000                         | 3820 $\pm$ 119              | 96          |
| IX      | –                                              | 350                          | 289 $\pm$ 32                | 83          |
|         |                                                | 3500                         | 3210 $\pm$ 39               | 92          |
|         |                                                | 7000                         | 6670 $\pm$ 31               | 95          |

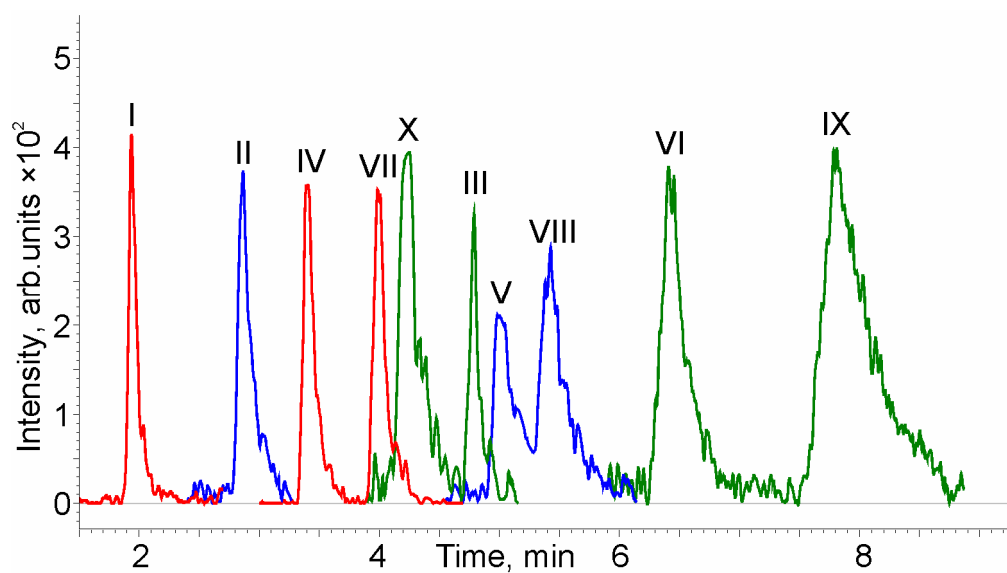

**Figure S1.** HPLC–MS/MS chromatogram of analytes model mixture with the concentrations close to LOQ (I, IV and III - 25 µg L<sup>-1</sup>; II, VII and X - 50 µg L<sup>-1</sup>; V - 75 µg L<sup>-1</sup>; VIII - 125 µg L<sup>-1</sup>; VI - 200 µg L<sup>-1</sup>; IX - 350 µg L<sup>-1</sup>).
